# Supplementary material for: The lidocaine metabolite N-ethylglycine has antinociceptive effects in experimental inflammatory and neuropathic pain
Source: PubMed Central journal article supplement — Pain. 2015 Apr 24;156(9):1647–59. doi: 10.1097/j.pain.0000000000000206 (PMC4617288; doi:10.1097/j.pain.0000000000000206), 2015-04-24
Supplement: jop-156-1647-s002.pdf [file jop-156-1647-s002.pdf]

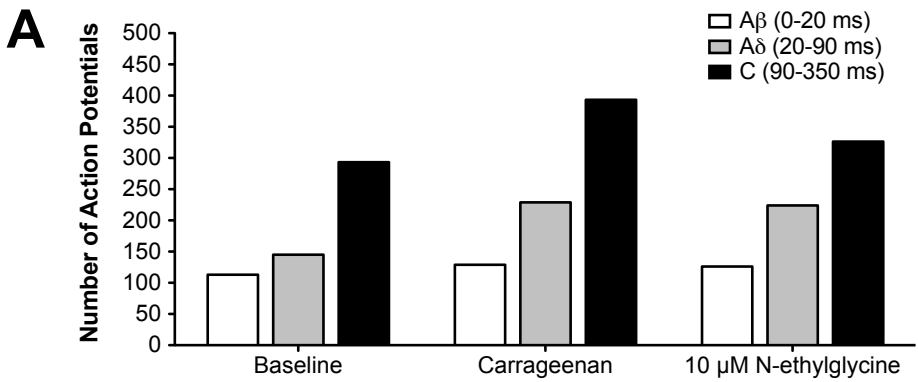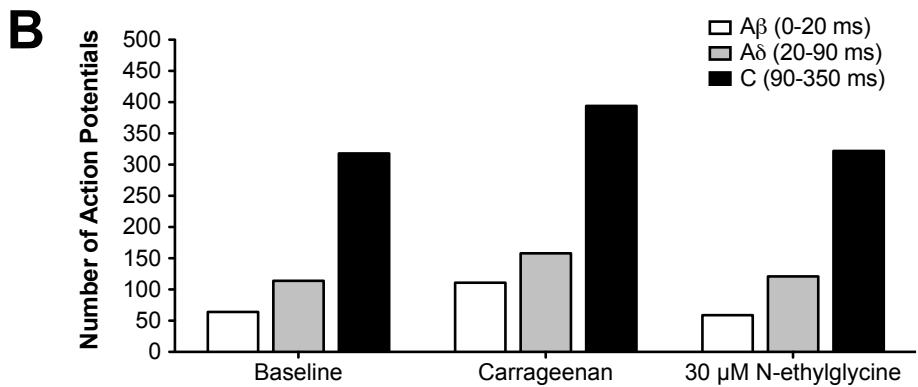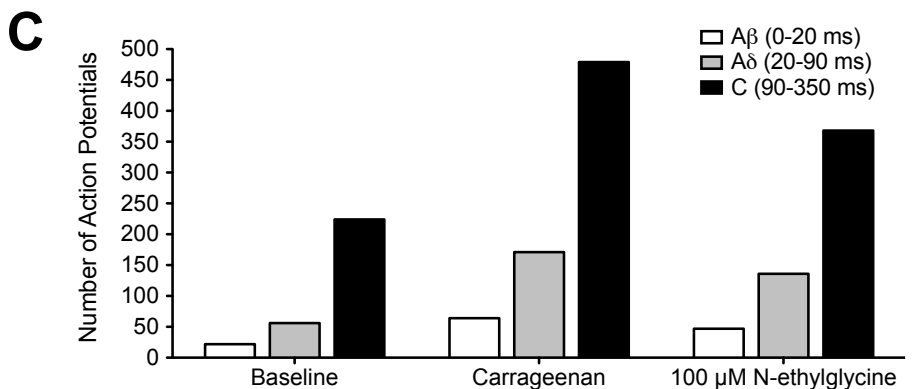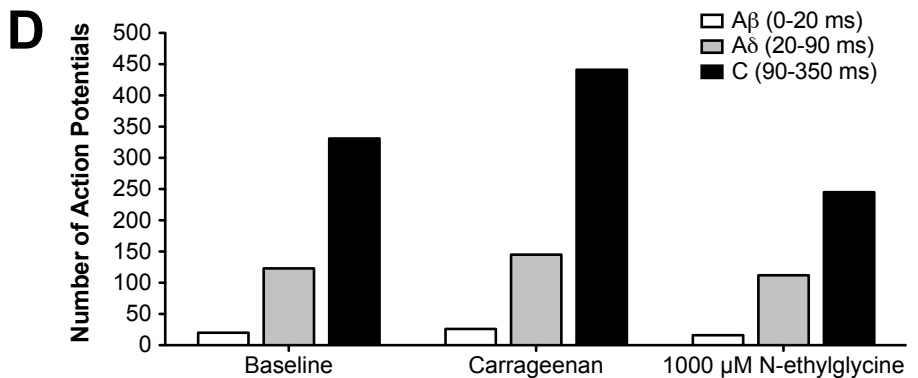

**Supplementary Digital Content 1.** Examples of single wide-dynamic-range neuron responses to electrical stimulation of the corresponding receptive field at baseline, 3 h after carrageenan injection and after spinal application of N-ethylglycine (EG) at indicated concentrations (Panel A to D). Detected action potentials were attributed to the three fiber types according to their stimulus-response latency (A $\beta$  fibers 0-20 ms, A $\delta$  fibers 20-90 ms and C fibers 90-350 ms).
